# Supplementary material for: The Human Cytomegalovirus β2.7 Long Non-Coding RNA Prevents Induction of Reactive Oxygen Species to Maintain Viral Gene Silencing during Latency
Source: MDPI journal article supplement (doi:10.3390/ijms231911017), 2022-09-20
Supplement: s1 [file s1]

## Supplementary Figures

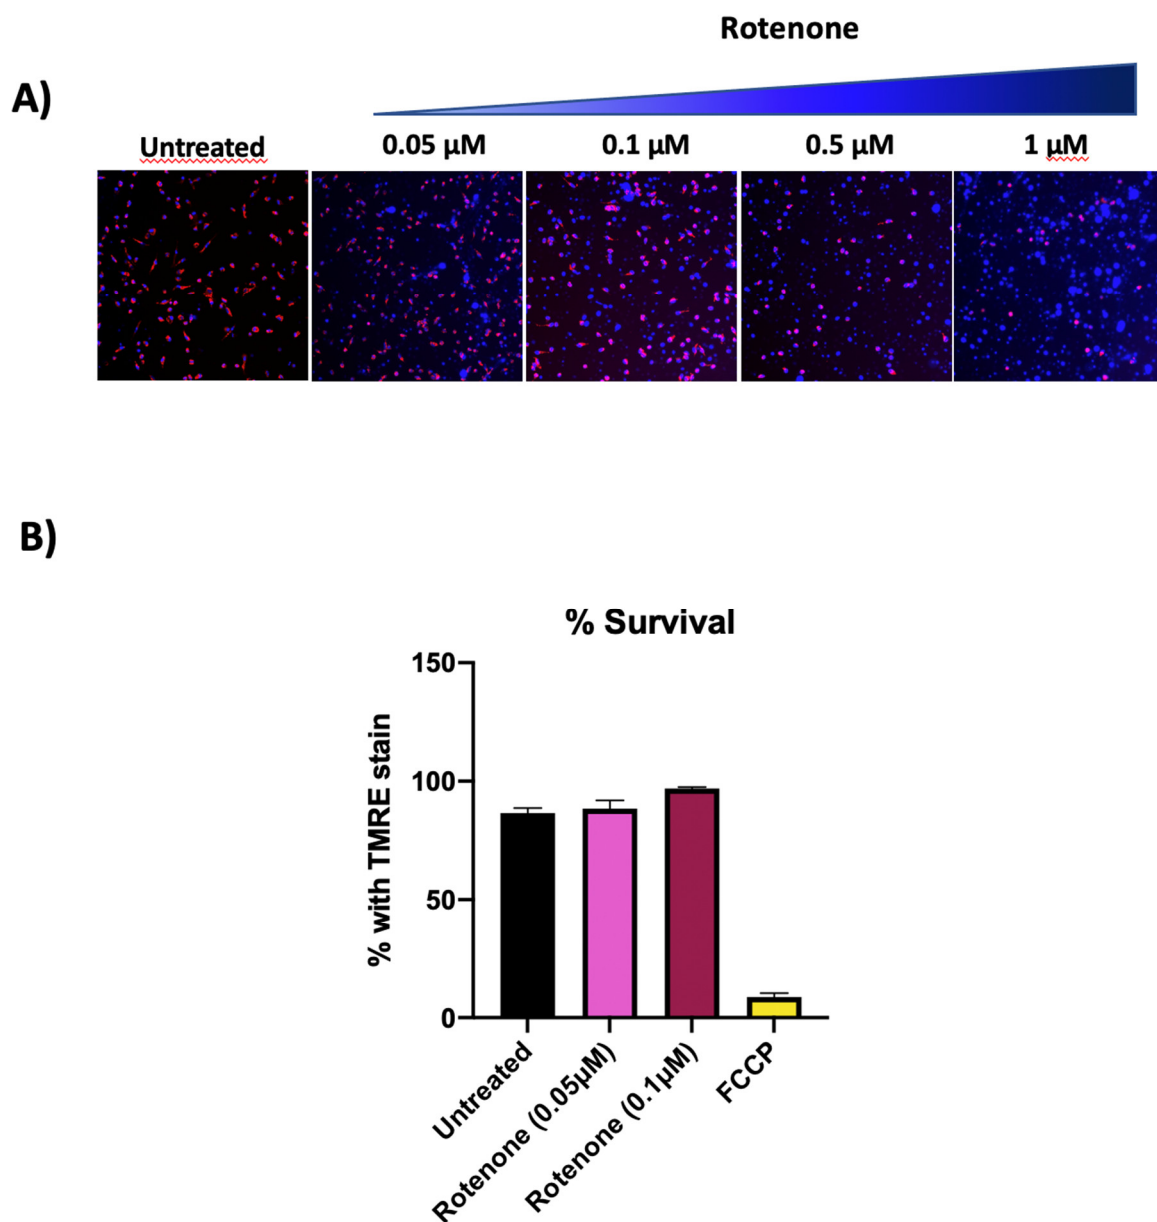

**Figure S1. Low levels of rotenone cause negligible cell death in CD14+ monocytes.** (A) CD14+ monocytes were treated with the indicated concentrations of rotenone. 5 days post treatment, cells were stained with TMRE (a stain for actively respiring mitochondria) and Hoechst and then imaged by fluorescence microscopy. (B) CD14+ monocytes were treated with low concentrations of rotenone for 5 days, or with FCCP FCCP (an uncoupler of mitochondrial oxidative phosphorylation) for 10mins. Cells were TMRE and Hoechst stained. The % of TMRE+ve cells was enumerated in 3 different fields of view for each condition indicated.

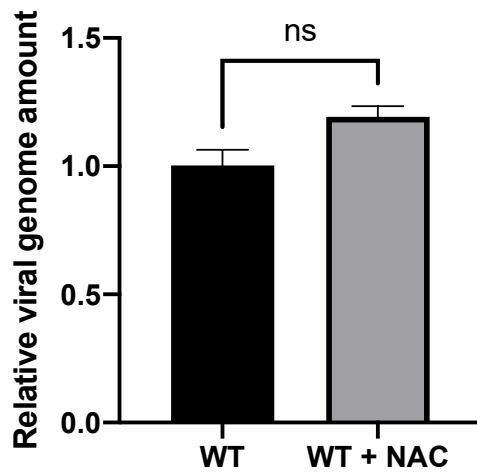

**Figure S2. NAC does not affect viral entry.** CD14<sup>+</sup> monocytes were pretreated with or without 1mM NAC for 2 hrs, before being infected with WT SV40-GFP TB40E virus at an MOI of 5. 1 day post infection, DNA was harvested and subject to qPCR for genomic viral DNA and the housekeeping gene, GAPDH. Graph shows mean and standard error of experiments performed in triplicate.

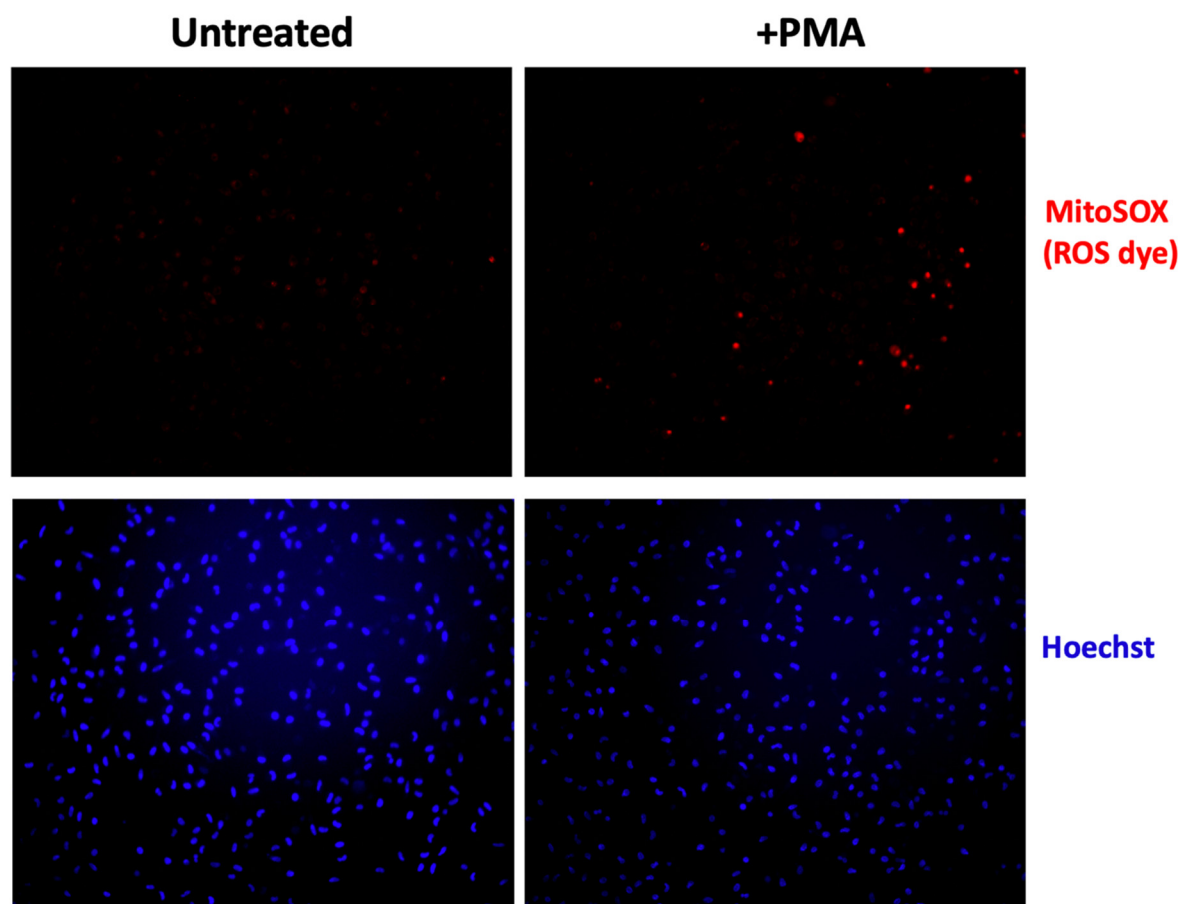

**Figure S3. The myeloid differentiation inducing agent, PMA, stimulates ROS production in monocytes.** CD14<sup>+</sup> monocytes were isolated and treated with 50 ng/ $\mu$ l PMA for 4 hours. Cells were then stained with the superoxide dye, MitoSOX and Hoechst and imaged under a fluorescence microscope.

**A)**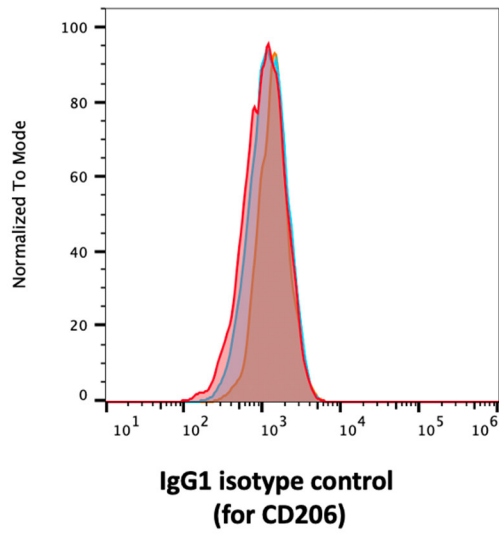

|   | Sample Name        | Mean : FL4-H |
|---|--------------------|--------------|
| ■ | Unstained          | 1220         |
| ■ | Untreated          | 1372         |
| ■ | +IL-4/GM-CSF + LPS | 1495         |

**B)**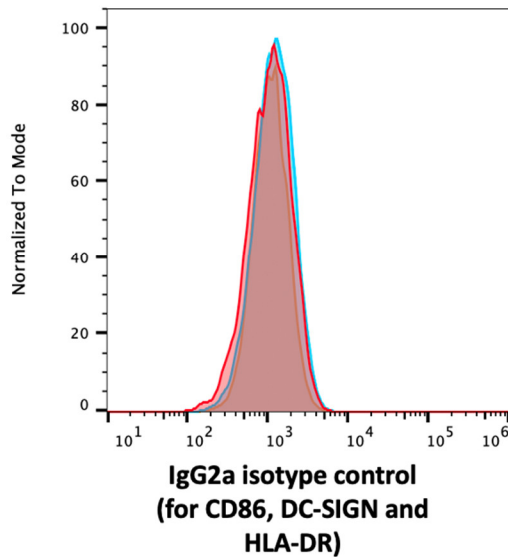

|   | Sample Name        | Median : FL4-H |
|---|--------------------|----------------|
| ■ | Unstained          | 1072           |
| ■ | Untreated          | 1192           |
| ■ | +IL-4/GM-CSF + LPS | 1060           |

**Figure S4. Isotype control antibody staining.** CD14<sup>+</sup> monocytes were untreated or differentiated and matured with IL-4/GM-CSF + LPS . Cells were stained with isotype control antibodies: **(A)** IgG1 for CD206, and **(B)** IgG2a for CD86, DC-SIGN and HLA-DR.
